# Supplementary material
Source: MDPI journal article supplement (https://www.mdpi.com/2072-4292/9/12/1273)
Supplement: s1 [file s1]

## Supporting Information for

### Improved atmospheric modelling of the oasis-desert system in Central Asia using WRF with actual satellite products

Miao Zhang<sup>1,2,3,4</sup>, Geping Luo<sup>1,3\*</sup>, Philippe De Maeyer<sup>2,4</sup>, Peng Cai<sup>1,2,3,4</sup> and, Alishir Kurban<sup>1,2,3,4</sup>

<sup>1</sup> State Key Laboratory of Desert and Oasis Ecology, Xinjiang Institute of Ecology and Geography, Chinese Academy of Sciences, No. 818, South Beijing Road, Urumqi 830011, Xinjiang, China; miaomiao@163.com (M.Z); caipeng13@mails.ucas.ac.cn (C.P); alishir@ms.xjb.ac.cn (A.K)

<sup>2</sup> Department of Geography, Ghent University, Krijgslaan 281, S8, B-9000 Ghent, Belgium; philippe.demaeyer@ugent.be

<sup>3</sup> University of the Chinese Academy of Sciences, Beijing 100049, China

<sup>4</sup> Sino-Belgian Joint Laboratory for Geo-information, Xinjiang Institute of Ecology and Geography, Urumqi 830011, China and B-9000 Ghent, Belgium

<sup>5</sup> Sino-Belgian Joint Laboratory for Geo-information, Ghent University, Krijgslaan 281, S8, B-9000 Ghent, Belgium

\* Correspondence: Geping Luo; E-mail address: luogp@ms.xjb.ac.cn; Tel.: +86-991-7823127; Fax: +86-991-7885320.

**Table S1. shows LU types and codes of for the 2012LU.**

| First level code | categories        | Sub-level code | Subcategories                                         |
|------------------|-------------------|----------------|-------------------------------------------------------|
| 1                | Cropland          | 11             | Irrigated crops (rice, lotus and other aquatic crops) |
|                  |                   | 12             | Non-irrigated crops (rainfed croplands)               |
| 2                | Forestland        | 21             | Closed(>30%)natural and artificial forests            |
|                  |                   | 22             | Closed(>40%) Shrub                                    |
|                  |                   | 23             | Closed(10%~30%) woodland                              |
|                  |                   | 24             | Other woodland (orchards, mulberry)                   |
| 3                | Grassland         | 31             | closed (>50%) grassland                               |
|                  |                   | 32             | Closed- to-open 20%~50% grassland                     |
|                  |                   | 33             | Open 5%~20% grassland                                 |
| 4                | Water and Wetland | 41             | Rivers and canals                                     |
|                  |                   | 42             | Lakes                                                 |
|                  |                   | 43             | Reservoir ponds                                       |
|                  |                   | 44             | Snow and ice                                          |
|                  |                   | 45             | Intertidal                                            |
|                  |                   | 46             | Floodplain                                            |
| 5                | Settlements       | 51             | Cities and towns                                      |
|                  |                   | 51             | Villages                                              |
|                  |                   | 53             | Other construction lands                              |
| 6                | Others            | 61             | Sandy land                                            |
|                  |                   | 62             | Gobi                                                  |
|                  |                   | 63             | Saline                                                |
|                  |                   | 64             | Marsh                                                 |
|                  |                   | 65             | Bare                                                  |
|                  |                   | 66             | Bare rock                                             |
|                  |                   | 67             | others                                                |

**Table S2. Land use type and its categories for WRF and the 2012LU**

| <b>Land use type</b>                         | <b>WRF</b> | <b>2013LU</b>                                                                                          |
|----------------------------------------------|------------|--------------------------------------------------------------------------------------------------------|
| <i>Urban and Built-Up Land</i>               | 1          | 51                                                                                                     |
| Dryland Cropland and Pasture                 | 2          |                                                                                                        |
| <i>Irrigated Cropland and Pasture</i>        | 3          | 11, 12, 52, 21 (if DEM < 1,500)                                                                        |
| Mixed Dryland/Irrigated Cropland and Pasture | 4          |                                                                                                        |
| Cropland/Grassland Mosaic                    | 5          |                                                                                                        |
| Cropland/Woodland Mosaic                     | 6          |                                                                                                        |
| <i>Grassland</i>                             | 7          | 31 (if DEM ≥ 1,000), 32 (if DEM ≥ 1,000), 33 (if DEM ≥ 1,000)                                          |
| <i>Shrubland</i>                             | 8          | 23, 22 (if DEM < 1,500)                                                                                |
| Mixed Shrubland/Grassland                    | 9          |                                                                                                        |
| Savanna                                      | 10         |                                                                                                        |
| Deciduous Broadleaf Forest                   | 11         |                                                                                                        |
| Deciduous Needleleaf Forest                  | 12         |                                                                                                        |
| Evergreen Broadleaf Forest                   | 13         |                                                                                                        |
| <i>Evergreen Needleleaf Forest</i>           | 14         | 21 (if DEM ≥ 1,500), 22 (if DEM ≥ 1,500)                                                               |
| Mixed Forest                                 | 15         |                                                                                                        |
| <i>Water Bodies</i>                          | 16         | 41, 42, 43, 46,                                                                                        |
| Herbaceous Wetland                           | 17         |                                                                                                        |
| Wooded Wetland                               | 18         |                                                                                                        |
| <i>Barren or Sparsely Vegetated</i>          | 19         | 61, 62, 63, 65, 67, 66 (if DEM < 3,400), 31 (if DEM < 1,000), 32 (if DEM < 1,000), 33 (if DEM < 1,000) |
| Herbaceous Tundra                            | 20         |                                                                                                        |
| Wooded Tundra                                | 21         |                                                                                                        |
| Mixed Tundra                                 | 22         |                                                                                                        |
| <i>Bare Ground Tundra</i>                    | 23         | 66 (if DEM ≥ 3,400)                                                                                    |
| <i>Snow or Ice</i>                           | 24         | 44                                                                                                     |

Land use type of the 2012LU can be seen in Table S1

Because the 2012LU uses a hierarchical classification system at a spatial resolution of 30 m, it was converted into the USGS classification system according to the corresponding relations in **Table S2** and then upscaled to land use at 1 km by employing a majority resampling technique. There were 9 land use types in the study area (shown in italic **Table S2**).
